# Supplementary material for: Effect of Special Low-Protein Foods Consumption in the Dietary Pattern and Biochemical Profile of Patients with Inborn Errors of Protein Metabolism: Application of a Database of Special Low-Protein Foods
Source: MDPI journal article supplement (doi:10.3390/nu15153475), 2023-08-06
Supplement: s1 [file s1]

**Table S1.** Characteristics of participants according to specific disorder of protein and amino acid metabolism. <sup>a</sup>

|                                            | <b>PKU<br/>(n=30)</b> | <b>PKU-BH4<br/>(n=9)</b> | <b>HCU<br/>(n=4)</b>  | <b>HTI<br/>(n=3)</b>  | <b>MSUD<br/>(n=2)</b> | <b>OAA<br/>(n=4)</b>  | <b>UCD<br/>(n=4)</b>  | <b>Transplanted<br/>(2 UCD – 1OAA)<br/>(n=3)</b> |
|--------------------------------------------|-----------------------|--------------------------|-----------------------|-----------------------|-----------------------|-----------------------|-----------------------|--------------------------------------------------|
| Age, years                                 | 10.4 (3.6 – 17.02)    | 3.9 (2.1 – 14.7)         | 7.7 (2.0 – 11.1)      | 0.9 (0.9 – 7.6)       | 9.2 (7.9 – 10.5)      | 9.2 (2.0 – 11.5)      | 12.9 (5.3 – 15.5)     | 6.6 (5.4 – 8.9)                                  |
| Females, n (%)                             | 17 (57)               | 4 (44)                   | 2 (50)                | 0 (0)                 | 1 (50)                | 1 (25)                | 1 (25)                | 1 (33)                                           |
| <b>Anthropometric Parameters (Z-score)</b> |                       |                          |                       |                       |                       |                       |                       |                                                  |
| Z-score weight                             | 0.1<br>(-1.9 – 4.7)   | 0.3<br>(-1.5 – 1.5)      | -0.8<br>(-2.9 – 1.6)  | -0.3<br>(-0.4 – -0.2) | 0.4<br>(0.4 – 0.5)    | -0.8<br>(-1.8 – 1.0)  | -0.6<br>(-0.7 – 0.7)  | -1.7<br>(-2.4 – 0.7)                             |
| Z-score height                             | -0.7<br>(-2.9 – 1.7)  | 0.2<br>(-2.4 – 1.4)      | 0.8<br>(-3.5 – 2.8)   | -2.0<br>(-2.4 – -1.1) | -1.2<br>(-1.8 – -0.6) | -1.0<br>(-2.9 – 1.3)  | -0.5<br>(-2.1 – 0.6)  | -2.9<br>(-3.7 – 0.0)                             |
| Z-score BMI                                | 1.06<br>(-2.0 – 4.8)  | 0.20<br>(-2.2 – 3.3)     | -0.13<br>(-3.4 – 0.6) | 1.03<br>(0.7 – 1.9)   | 1.62<br>(1.1 – 2.1)   | -0.27<br>(-1.8 – 0.6) | -0.10<br>(-0.7 – 0.5) | -0.01<br>(-1.4 – 1.1)                            |
| <b>Plasma biochemical analysis (mg/dL)</b> |                       |                          |                       |                       |                       |                       |                       |                                                  |
| Glucose, mg/dl                             | 86<br>(70 – 103)      | 83<br>(72 – 128)         | 85<br>(70 – 101)      | 81<br>(80 – 95)       | 83<br>(80 – 85)       | 96<br>(65 – 104)      | 89<br>(70 – 94)       | 86<br>(86 – 87)                                  |
| TAG, mg/dl                                 | 65<br>(36 – 150)      | 56<br>(40 – 130)         | 68<br>(34 – 90)       | 80<br>(70 – 100)      | 79<br>(78 – 79)       | 82<br>(67 – 129)      | 53<br>(29 – 58)       | 102<br>(73 – 102)                                |
| TC, mg/dl                                  | 134<br>(95 – 186)     | 136<br>(120 – 190)       | 137<br>(120 – 166)    | 120<br>(104 – 120)    | 157<br>(147 – 166)    | 203<br>(148 – 222)    | 142<br>(100 – 209)    | 171<br>(121–248)                                 |
| HDL-C mg/dl                                | 51<br>(33 – 84)       | 50<br>(33 – 60)          | 56<br>(46 – 70)       | 52<br>(39 – 55)       | 57<br>(53 – 61)       | 65<br>(53 – 72)       | 51<br>(45 – 85)       | 50<br>(45 – 68)                                  |
| LDL-C mg/dl                                | 68<br>(49 – 120)      | 76<br>(52 – 115)         | 76<br>(63 – 83)       | 70<br>(53 – 70)       | 84<br>(70 – 98)       | 126<br>(62 – 152)     | 82<br>(55 – 113)      | 121<br>(76 – 165)                                |

<sup>a</sup> Values are median (min - max) or *n* (%). BMI, body mass index; HCU, classical homocystinuria; HDL-C, high-density lipoprotein cholesterol; HTI, hereditary tyrosinaemia type I; LDL-C, low-density lipoprotein cholesterol; MSUD, maple syrup urine disease; OAA, organic acidurias; PKU, phenylketonuria; PKU – BH4, phenylketonuria with tetrahydrobiopterin treatment; TAG, triglycerides; TC, total cholesterol; UCD, urea cycle disorders.

**Table S2.** Energy and macronutrient intake from the dietary data by group of disorder.<sup>a</sup>

|                                     | <b>PKU<br/>(n=30)</b> | <b>PKU-BH4<br/>(n=9)</b> | <b>HCU<br/>(n=4)</b>  | <b>HTI<br/>(n=3)</b>  | <b>MSUD<br/>(n=2)</b> | <b>OAA<br/>(n=4)</b>  | <b>UCD<br/>(n=4)</b>  | <b>Transplanted<br/>(2 UCD – 1OAA)<br/>(n=3)</b> |
|-------------------------------------|-----------------------|--------------------------|-----------------------|-----------------------|-----------------------|-----------------------|-----------------------|--------------------------------------------------|
| Energy, Kcal/day                    | 2235 (1398 – 3344)    | 1581 (1131 – 2768)       | 1876 (1179 – 2614)    | 1652 (1591 – 2596)    | 2462 (1904 – 3019)    | 2411 (1297 – 2712)    | 2062 (1563 – 2589)    | 1468 (1431 – 1761)                               |
| Protein, g/day                      | 73.8 (31.6 – 128.9)   | 36.0 (16.8 – 99.5)       | 54.4 (24.7 – 70.4)    | 30.5 (27.5 – 60.3)    | 57.9 (46.4 – 69.4)    | 45.9 (19.2 – 63.2)    | 44.4 (26.0 – 52.5)    | 33.4 (28.8 – 36.0)                               |
| Protein, %                          | 13.2 (8.2 – 20.7)     | 8.2 (5.8 – 19.7)         | 10.8 (8.4 – 12.8)     | 7.7 (6.7 – 9.3)       | 9.5 (9.2 – 9.7)       | 7.4 (5.9 – 9.8)       | 8.2 (7.1 – 9.0)       | 8.0 (7.6 – 9.8 0)                                |
| Natural protein, g/day <sup>U</sup> | 12.4 (5.7 – 22.2)     | 18.8 (9.4 – 25.2)        | 16.8 (8.1 – 25.6)     | 7.9 (7.6 – 12.4)      | 17.6 (16.2 – 19.0)    | 24.4 (9.1 – 29.6)     | 38.7 (26.0 – 44.9)    | 33.4 (28.8 – 36.0)                               |
| Natural Protein, %                  | 2.2 (0.9 – 4.4)       | 5.1 (2.2 – 6.8)          | 3.4 (2.7 – 4.7)       | 1.9 (1.9 – 1.9)       | 3.0 (2.5 – 3.4)       | 3.8 (2.8 – 5.1)       | 7.7 (5.2 – 9.0)       | 8.0(7.6 – 9.8)                                   |
| Carbohydrates, g/day                | 309.9 (152.5 – 496.3) | 218.9 (127.7 – 367.4)    | 226.6 (155.9 – 364.9) | 217.6 (206.9 – 384.0) | 337.4 (303.0 – 371.9) | 339.7 (178.3 – 361.4) | 266.5 (183.4 – 370.2) | 188.8 (175.9 – 232.2)                            |
| Carbohydrates, %                    | 53.8 (40.6 – 63.0)    | 52.9 (44.0 – 62.7)       | 53.0 (41.5 – 55.8)    | 54.7 (50.1 – 59.2)    | 56.5 (49.3 – 63.6)    | 54.4 (53.3 – 59.4)    | 53.7 (45.2 – 57.6)    | 51.5 (49.2 – 52.8)                               |
| Sugars, g                           | 72.6 (14.8 – 142.1)   | 56.0 (25.0 – 91.8)       | 74.9 (27.9 – 102.8)   | 64.2 (59.1 – 65.8)    | 78.7 (76.0 – 81.4)    | 79.7 (50.7 – 108.8)   | 57.8 (33.2 – 70.2)    | 53.4 (36.5 – 79.0)                               |
| Sugars, %                           | 12.5 (3.4 – 24.9)     | 13.9 (8.5 – 24.1)        | 16.4 (7.4 – 18.2)     | 14.9 (10.1 – 15.6)    | 13.6 (10.1 – 17.1)    | 14.6 (12.8 – 16.1)    | 11.0 (7.1 – 14.2)     | 14.6 (10.2 – 17.9)                               |
| Fiber, g/day                        | 19.0 (8.9 – 58.5)     | 18.8 (10.8 – 61.5 3)     | 20.1 (10.1 – 24.3)    | 23.0 (17.0 – 23.9)    | 42.5 (39.7 – 45.4)    | 19.5(6.5 – 35.3)      | 12.6 (8.8 – 35.1)     | 19.0 (4.8 – 19.4)                                |
| Starch, g/day                       | 5.2 (0 – 75.4)        | 14.5 (2.0 – 25.6)        | 5.6 (1.9 – 23.4)      | 4.3(2.9 – 8.1)        | 25.0 (4.3 – 45.8)     | 21.8 (8.5 – 45.3)     | 19.4 (2.0 – 38.6)     | 23.2 (12.9 – 30.2)                               |
| Total fat, g/day                    | 76.3 (52.7 – 111.7)   | 59.6 (35.0 – 99.8)       | 83.5 (48.2 – 96.7)    | 79.4 (65.5 – 91.0)    | 95.1 (52.3 – 137.9)   | 93.8 (55.4 – 114.0)   | 88.6 (68.3 – 98.4)    | 67.9 (62.6 – 76.6)                               |
| Total fat, %                        | 31.8 (22.8 – 42.3)    | 33.9 (25.6 – 48.0)       | 36.5 (33.3 – 45.8)    | 37.1 (31.6 – 43.2)    | 32.9 (24.7 – 41.1)    | 37.2 (33.3 – 38.4)    | 38.1 (33.1 – 45.1)    | 39.1 (38.4 – 42.7)                               |
| SFA, %                              | 8.2 (4.1 – 13.3)      | 8.6 (5.1 – 13.8)         | 11.1 (8.6 – 16.1)     | 10.3 (8.2 – 14.7)     | 8.9 (6.7 – 11.2)      | 11.3 (7.7 – 12.9)     | 9.8 (6.1 – 15.4)      | 11.7 (9.4 – 13.3)                                |
| MUFA, %                             | 13.4 (7.5 – 22.1)     | 17.2 (11.0 – 24.1)       | 14.8 (13.3 – 18.8)    | 17.8(15.1 – 19.0)     | 17.3(12.6 – 22.0)     | 16.9 (14.8 – 19.2)    | 16.2(14.3 – 18.7)     | 19.5 (18.2 – 21.0)                               |
| PUFA, %                             | 4.0 (1.7 – 6.1)       | 4.0 (2.8 – 5.0)          | 3.3 (2.2 – 4.7)       | 6.7 (6.2 – 6.9)       | 4.1 (2.8 – 5.5)       | 4.0 (2.8 – 4.6)       | 6.4 (4.0 – 9.6)       | 4.0 (3.8 – 4.6)                                  |
| Cholesterol, g/day                  | 10.6 (0 – 151.5)      | 71.5 (21.7 – 172.3)      | 51.5 (19.0 – 132.3)   | 10.8 (0 – 79.1)       | 31.9 (31.0 – 32.8)    | 131.1 (14.3 – 191.5)  | 117.8 (85.4 – 143.8)  | 88.8 (63.4 – 101.8)                              |

<sup>a</sup> All values are in median (min - max). <sup>U</sup> The natural protein included high biological value protein and also that from fruits, vegetables and potatoes.

HCU, classical homocystinuria; HTI, hereditary tyrosinaemia type I; MSUD, maple syrup urine disease; MUFA, monounsaturated fatty acids; OAA, organic acidurias; PFAAs, precursor-free L-amino acid supplement; PKU, phenylketonuria; PKU – BH4, phenylketonuria with tetrahydrobiopterin treatment; PUFA, polyunsaturated fatty acids; SFA, saturated fatty acids; UCD, urea cycle disorders.

**Table S3.** Special low-protein foods (SLPFs) intake by group of disorder. <sup>a</sup>

|                         | <b>PKU<br/>(n=30)</b>   | <b>PKU-BH4<br/>(n=9)</b> | <b>HCU<br/>(n=4)</b> | <b>HTI<br/>(n=3)</b>   | <b>MSUD<br/>(n=2)</b>    | <b>OAA<br/>(n=4)</b>    | <b>UCD<br/>(n=4)</b> | <b>Transplanted<br/>(2 UCD – 1OAA)<br/>(n=3)</b> |
|-------------------------|-------------------------|--------------------------|----------------------|------------------------|--------------------------|-------------------------|----------------------|--------------------------------------------------|
| Energy Kcal/day         | 613 (188 – 1363)        | 378 (50 – 849)           | 585 (166 – 1140)     | 413 (190 – 703)        | 725 (675 – 774)          | 643 (377 – 1209)        | 347 (164 – 599)      | 579 (215 – 638)                                  |
| Energy, %               | 30 (13 – 53)            | 25 (4 – 36)              | 30 (11 – 44)         | 25 (12 – 27)           | 31 (26 – 36)             | 34 (17 – 53)            | 18 (6 – 31)          | 33 (15 – 45)                                     |
| Protein, g/day          | 2.1 (0.4 – 6.0)         | 1.4 (0.3 – 6.3)          | 1.6 (0.3 – 6.5)      | 1.5 (0.2 – 2.6)        | 2.8 (2.2 – 3.3)          | 1.7 (0.9 – 3.8)         | 1.1 (0.1 – 3.0)      | 0.0 (0.0 – 3.2)                                  |
| Protein, %              | 1.4 (0.3 – 5.6)         | 1.7 (0.9 – 7.1)          | 0.9 (0.6 – 2.1)      | 1.5 (0.2 – 3.2)        | 1.5 (1.4 – 1.7)          | 1.1 (0.6 – 1.4)         | 0.9 (0.0 – 2.1)      | 0.0 (0.0 – 2.1)                                  |
| Carbohydrates,<br>g/day | 121.8 (30.0 –<br>251.8) | 58.0 (7.7 – 167.9)       | 108.8 (36.9 – 209.8) | 64.4 (43.4 –<br>111.4) | 131.0 (129.3 –<br>132.8) | 103.8 (84.4 –<br>179.7) | 70.2 (39.2 – 97.9)   | 81.7 (26.2 – 96.4)                               |
| Carbohydrates, %        | 24.2 (8.4 – 37.9)       | 19.2 (2.7 – 25.2)        | 22.6 (9.8 – 32.1)    | 15.6 (10.9 – 17.2)     | 22.4 (17.6 – 27.2)       | 20.8 (14.7 – 34.7)      | 16.1 (6.1 – 20.0)    | 21.9 (7.1 – 22.8)                                |
| Sugars, g               | 13.2 (0.2 – 64.7)       | 8.5 (0.7 – 23.4)         | 18.5 (0.2 – 38.8)    | 9.3 (7.4 – 14.9)       | 21.2 (19.6 – 22.8)       | 24.3 (0.7 – 37.8)       | 5.6 (0.4 – 14.7)     | 22.1 (11.3 – 27.9)                               |
| Sugars, %               | 2.6 (0.03 – 10.7)       | 1.5 (0.2 – 7.5)          | 3.3 (0.1 – 6.2)      | 1.9 (1.4 – 3.6)        | 3.7 (2.6 – 4.8)          | 4.5 (0.1 – 8.0)         | 1.2 (0.1 – 3.0)      | 5.0 (3.1 – 7.8)                                  |
| Fiber, g/day            | 4.8 (0.0 – 26.0)        | 1.1 (0.7 – 5.7)          | 6.6 (0.1 – 14.2)     | 1.5 (0.1 – 2.3)        | 4.7 (2.5 – 6.9)          | 0.7 (0.0 – 1.1)         | 1.5 (0.0 – 25.6)     | 0.0 (0.0 – 3.2)                                  |
| Starch, g/day           | 0.0 (0.0 – 43.7)        | 0.0 (0.0 – 21.9)         | 0.0 (0.0 – 0.0)      | 0.0 (0.0 – 0.0)        | 0.00 (0.0 – 0.0)         | 0.0 (0.0 – 6.5)         | 0.0 (0.0 – 0.0)      | 0.0 (0.0 – 14.6)                                 |
| Total fat, g/day        | 17.1 (0.7 – 38.5)       | 8.3 (1.1 – 20.3)         | 15.9 (1.9 – 43.7)    | 17.6 (1.2 – 27.5)      | 21.1 (16.6 – 25.6)       | 24.6 (4.0 – 52.8)       | 17.8 (0.6 – 22.5)    | 20.1 (12.3 – 31.4)                               |
| Total fat, %            | 7.3 (0.3 – 14.2)        | 5.5 (0.7 – 14.9)         | 6.9 (1.2 – 15.1)     | 9.5 (0.7 – 9.6)        | 7.7 (7.6 – 7.8)          | 12.9 (1.6 – 17.5)       | 8.8 (0.2 – 10.2)     | 10.3 (7.5 – 19.8)                                |
| SFA, %                  | 3.2 (0.1 – 9.2)         | 3.5 (0.1 – 8.5)          | 3.6 (0.6 – 5.5)      | 4.2 (0.2 – 4.7)        | 4.0 (3.9 – 4.1)          | 5.5 (0.7 – 9.3)         | 3.1 (0.1 – 5.4)      | 3.8 (3.5 – 7.0)                                  |
| MUFA, %                 | 0.7 (0.0 – 3.9)         | 0.0 (0.0 – 3.5)          | 1.1 (0.01 – 2.4)     | 2.8 (0.04 – 3.7)       | 2.0 (1.8 – 2.3)          | 3.3 (0.6 – 5.6)         | 1.4 (0.0 – 3.2)      | 2.6 (1.7 – 8.6)                                  |
| PUFA, %                 | 0.2 (0.0 – 1.7)         | 0.0 (0.0 – 1.0)          | 0.2 (0.01 – 0.4)     | 0.4 (0.1 – 1.2)        | 0.5 (0.5 – 0.6)          | 0.8 (0.1 – 1.6)         | 0.8 (0.01 – 2.1)     | 0.4 (0.3 – 2.1)                                  |
| Cholesterol, g/day      | 0.0 (0.0 – 10.2)        | 0.0 (0.0 – 5.0)          | 0.3 (0.0 – 4.3)      | 0.0 (0.0 – 0.0)        | 12.7 (0.0 – 25.5)        | 0.0 (0.0 – 7.7)         | 0.0 (0.0 – 21.7)     | 0.0 (0.0 – 0.0)                                  |

<sup>a</sup> All values are in median (min - max).

HCU, classical homocystinuria; HTI, hereditary tyrosinaemia type I; MSUD, maple syrup urine disease; MUFA, monounsaturated fatty acids; OAA, organic acidurias;

PFAAs, precursor-free L-amino acid supplement; PKU, phenylketonuria; PKU – BH4, phenylketonuria with tetrahydrobiopterin treatment; PUFA, polyunsaturated fatty acids;

SFA, saturated fatty acids; UCD, urea cycle disorders.

**Table S4.** Precursor-free L-amino acid supplements (PFAAs) intake by group of disorder. <sup>a</sup>

|                      | <b>PKU<br/>(n=30)</b> | <b>PKU-BH4<br/>(n=9)</b> | <b>HCU<br/>(n=4)</b> | <b>HTI<br/>(n=3)</b> | <b>MSUD<br/>(n=2)</b> | <b>OAA<br/>(n=4)</b> | <b>UCD<br/>(n=4)</b> | <b>Transplanted<br/>(2 UCD – 1OAA)<br/>(n=3)</b> |
|----------------------|-----------------------|--------------------------|----------------------|----------------------|-----------------------|----------------------|----------------------|--------------------------------------------------|
| Energy Kcal/day      | 620 (334 – 1135)      | 237 (0.0 – 1015)         | 295 (278 – 381)      | 801 (686 – 880)      | 706 (381 – 1031)      | 295 (83 – 844)       | 0 (0 – 948)          | 0 (0 – 0)                                        |
| Energy, %            | 29 (14 – 52)          | 16 (0.0 – 37)            | 19 (11 – 26)         | 42 (34 – 50)         | 27 (20 – 34)          | 13 (6 – 33)          | 0 (0 – 37)           | 0 (0 – 0)                                        |
| Protein, g/day       | 59.1 (14.6 – 115.6)   | 19.5 (0.0 – 80.6)        | 37.5 (16.6 – 44.9)   | 22.9 (19.7 – 47.9)   | 40.3 (30.2 – 50.4)    | 16.8 (10.1 – 42.8)   | 0.0 (0.0 – 19.0)     | 0.0 (0.0 – 0.0)                                  |
| Protein, %           | 10.3(3.8 – 18.5)      | 5.1(0.0 – 14.1)          | 7.4(5.6 – 8.0)       | 5.8(4.8 – 7.4)       | 6.5(6.3 – 6.7)        | 3.2(2.1 – 6.6)       | 0.0(0.0 – 2.9)       | 0.0(0.0 – 0.0)                                   |
| Carbohydrates, g/day | 62.3 (12.8 – 129.6)   | 30.6 (0.0 – 92.2)        | 27.8 (21.1 – 35.1)   | 86.6 (74.3 – 130.5)  | 68.6 (34.6 – 102.6)   | 33.5 (10.3 – 81.9)   | 0.0 (0.0 – 164.7)    | 0.0 (0.0 – 0.0)                                  |
| Carbohydrates, %     | 12.2 (2.6 – 59.2)     | 8.4 (0.0 – 14.0)         | 6.5 (3.2 – 11.9)     | 20.1 (18.0 – 21.8)   | 10.4 (7.3 – 13.6)     | 5.6 (3.2 – 12.7)     | 0.0 (0.0 – 25.5)     | 0.0 (0.0 – 0.0)                                  |
| Sugars, g            | 8.8 (0.0 – 32.2)      | 3.9 (0.0 – 26.3)         | 13.9 (3.6 – 17.6)    | 11.1 (0.0 – 13.0)    | 4.6 (3.5 – 5.8)       | 6.6 (4.7 – 14.0)     | 0.0 (0.0 – 0.0)      | 0.0 (0.0 – 0.0)                                  |
| Sugars, %            | 1.6 (0.0 – 6.2)       | 1.1 (0.0 – 9.2)          | 2.9 (1.0 – 3.5)      | 2.7 (0.0 – 3.3)      | 0.7 (0.7 – 0.8)       | 1.6 (0.7 – 2.1)      | 0.0 (0.0 – 0.0)      | 0.0 (0.0 – 0.0)                                  |
| Fiber, g/day         | 0.6 (0.0 – 26.3)      | 0.3 (0.00 – 32.3)        | 6.6 (0.0 – 13.1)     | 8.0 (1.6 – 9.3)      | 16.1 (12.1 – 20.2)    | 2.4 (0.0 – 1.1)      | 0.0 (0.0 – 0.0)      | 0.0 (0.0 – 0.0)                                  |
| Starch, g/day        | 0.0 (0.0 – 0.0)       | 0.0 (0.0 – 0.0)          | 0.0 (0.0 – 0.0)      | 0.0 (0.0 – 0.0)      | 0.0 (0.0 – 0.0)       | 0.0 (0.0 – 0.0)      | 0.0 (0.0 – 0.0)      | 0.0 (0.0 – 0.0)                                  |
| Total fat, g/day     | 15.2 (1.3 – 38.3)     | 5.9 (0.0 – 36.0)         | 6.6 (1.6 – 13.5)     | 34.5 (18.5 – 40.3)   | 30.0 (13.5 – 46.5)    | 10.5 (0.1 – 38.3)    | 0.0 (0.0 – 23.7)     | 0.0 (0.0 – 0.0)                                  |
| Total fat, %         | 6.1 (0.5 – 19.8)      | 4.5 (0 – 11.7)           | 4.4 (0.5 – 8.9)      | 18.8 (6.4 – 22.8)    | 10.1 (6.4 – 13.9)     | 4.2 (0.1 – 13.3)     | 0.0 (0.0 – 8.2)      | 0.0 (0.0 – 0.0)                                  |
| SFA, %               | 1.1 (0.0 – 5.8)       | 0.7 (0.0 – 1.9)          | 0.6 (0.0 – 2.9)      | 6.1 (1.0 – 7.4)      | 2.4 (1.0 – 3.9)       | 1.4 (0.0 – 3.7)      | 0.0 (0.0 – 1.2)      | 0.0 (0.0 – 0.0)                                  |
| MUFA, %              | 2.2 (0.0 – 11.0)      | 1.7 (0.0 – 7.7)          | 1.8 (0.0 – 5.3)      | 7.7 (1.4 – 9.3)      | 5.5 ( 4.2 – 6.9)      | 1.7 (0.0 – 6.7)      | 0.0 (0.0 – 1.8)      | 0.0 (0.0 – 0.0)                                  |
| PUFA, %              | 1.9 (0.0 – 11.1)      | 0.9 (0.0 – 2.6)          | 0.6 (0.0 – 1.9)      | 4.1 (3.7 – 5.0)      | 1.6 (0.9 – 2.3)       | 0.9 (0.0 – 2.2)      | 0.0 (0.0 – 4.8)      | 0.0 (0.0 – 0.0)                                  |
| Cholesterol, g/day   | 0.0 (0.0 – 0.0)       | 0.0 (0.0 – 0.0)          | 0.0 (0.0 – 0.0)      | 0.0 (0.0 – 0.0)      | 0.0 (0.0 – 0.0)       | 0.0 (0.0 – 0.0)      | 0.0 (0.0 – 0.0)      | 0.0 (0.0 – 0.0)                                  |

<sup>a</sup> All values are in median (min - max). HCU, classical homocystinuria; HTI, hereditary tyrosinaemia type I; MSUD, maple syrup urine disease; MUFA, monounsaturated fatty acids; OAA, organic acidurias; PKU, phenylketonuria; PKU – BH4, phenylketonuria with tetrahydrobiopterin treatment; PUFA, polyunsaturated fatty acids; SFA, saturated fatty acids; UCD, urea cycle disorders.

**Table S5.** Characteristics of study participants, dietary intake, and plasma biochemical parameters by tertiles of percentage of SLPFs consumption. <sup>1</sup>

| Tertiles of SLPFs consumption |                                  |                                 |                                 |          |
|-------------------------------|----------------------------------|---------------------------------|---------------------------------|----------|
|                               | 1<br>< 24 %<br>(n = 19)          | 2<br>24 – 32 %<br>(n = 20)      | 3<br>> 32 %<br>(n = 20)         | <i>P</i> |
| Age, years                    | 7.4 (3.7 – 11.1)                 | 8.9 (5.2 – 12.6)                | 10.7 (7.7 – 14.2)               | 0.17     |
| Females, <i>n</i> (%)         | 6 (32)                           | 11 (55)                         | 10 (50)                         | 0.31     |
| Anthropometric parameters     |                                  |                                 |                                 |          |
| Weight Z-score                | -0.3 (–0.9 – 0.6)                | 0.1 (–0.8 – 0.6)                | 0.3 (–0.6 – 0.8)                | 0.52     |
| Height Z-score                | -1.0 (–2.1 – 0.3)                | -0.8 (–1.2 – 0.6)               | -0.5 (–2.0 – 0.2)               | 0.76     |
| BMI Z-score                   | 0.5 (–0.03 – 0.9)                | 0.7 (–0.6 – 1.1)                | 1.1 (–0.5 – 1.4)                | 0.59     |
| Dietary intake                |                                  |                                 |                                 |          |
| Total energy, kcal/day        | 1591 (1463 – 2161) <sup>b</sup>  | 2094 (1770 – 2556) <sup>a</sup> | 2362 (1758 – 2590) <sup>a</sup> | 0.013    |
| Energy from SLPFs, %          | 14.8 (12.0 – 19.7) <sup>c</sup>  | 28.1 (25.7 – 30.6) <sup>b</sup> | 39.7 (35.1 – 43.7) <sup>a</sup> | <0.001   |
| Energy from PFAAs, %          | 28.7 (16.4 – 36.4) <sup>ab</sup> | 32.6 (23.0 – 36.2) <sup>a</sup> | 20.5 (7.6 – 28.3) <sup>b</sup>  | 0.043    |
| Total protein, %              | 9.8 (8.1 – 13.7)                 | 9.9 (9.0 – 14.1)                | 11.5 (8.5 – 15.1)               | 0.56     |
| Natural Protein, %            | 4.4 (3.0 – 5.3) <sup>a</sup>     | 2.1 (1.9 – 3.7) <sup>b</sup>    | 2.4 (1.9 – 3.8) <sup>b</sup>    | 0.015    |
| Carbohydrates, %              | 53.1 (50.1 – 57.2)               | 53.0 (50.7 – 58.7)              | 54.0 (52.8 – 57.1)              | 0.59     |
| Sugars, %                     | 13.2 (11.7 – 14.9)               | 11.6 (8.5 – 15.5)               | 15.8 (12.0 – 17.1)              | 0.058    |
| Fiber, g/day                  | 19.0 (12.9 – 26.4)               | 19.4 (16.7 – 32.2)              | 18.8 (14.9 – 24.9)              | 0.63     |
| Total fats, %                 | 34.2 (33.1 – 39.1)               | 33.4 (31.0 – 40.3)              | 32.7 (29.4 – 37.9)              | 0.54     |
| SFAs, %                       | 9.2 (6.3 – 10.4)                 | 9.2 (6.6 – 11.4)                | 8.7 (7.6 – 12.5)                | 0.78     |
| MUFAs, %                      | 17.1 (14.4 – 18.8)               | 15.9 (12.3 – 18.4)              | 13.4 (12.3 – 16.8)              | 0.11     |
| PUFAs, %                      | 4.6 (3.8 – 5.2) <sup>a</sup>     | 4.4 (3.4 – 5.8) <sup>a</sup>    | 3.4 (2.5 – 4.5) <sup>b</sup>    | 0.016    |
| Cholesterol, mg/day           | 63.4 (29.4 – 132.9)              | 31.3 (7.0 – 70.5)               | 20.3 (6.5 – 54.1)               | 0.084    |
| Plasma biochemical parameters |                                  |                                 |                                 |          |
| Glucose, mg/dL                | 85.0 (81.0 – 94.0)               | 84.0 (81.0 – 89.0)              | 86.0 (78.0 – 92.0)              | 0.65     |

|                         |                       |                       |                       |      |
|-------------------------|-----------------------|-----------------------|-----------------------|------|
| Triglycerides, mg/dL    | 63.0 (53.0 – 92.0)    | 64.0 (44.5 – 76.8)    | 73.5 (60.3 – 89.8)    | 0.20 |
| Total Cholestrol, mg/dL | 127.0 (121.0 – 182.0) | 133.5 (116.3 – 150.3) | 149.5 (124.8 – 167.5) | 0.32 |
| HDL-C, mg/dL            | 51.0 (48.0 – 56.0)    | 52.0 (41.3 – 60.0)    | 52.0 (44.8 – 59.5)    | 0.99 |
| LDL-C mg/dL             | 76.0 (63.0 – 112.0)   | 68.5 (58.8 – 86.8)    | 80.5 (58.3 – 97.3)    | 0.36 |

<sup>1</sup> All values are median (P25 - P75) or n (%). Medians in a row with superscripts without a common letter differ, P < 0.05. Data analyzed by Kruskal–Wallis and Mann–Whitney post-hoc test or Chi square test.

**Table S6.** Characteristics of plasma biochemical analysis by tertiles of percentage of dairy SLPF consumption. <sup>1,2</sup>

| <b>Plasma Biochemical Analysis (mg/dL)</b>                              | <b>1<br/>&lt; 1.0%<br/>(n = 19)</b>             | <b>2<br/>1.0 – 5.2 %<br/>(n = 20)</b>           | <b>3<br/>&gt; 5.2 %<br/>(n = 20)</b>            | <b>p</b> |
|-------------------------------------------------------------------------|-------------------------------------------------|-------------------------------------------------|-------------------------------------------------|----------|
| <b>Glucose</b>                                                          |                                                 |                                                 |                                                 |          |
| Normal glucose levels (< 100 mg/dL), median (IQR), [n (%)]              | 85.0 (81.5 – 91.5)<br>[16 (84)]                 | 83.0 (77.0 – 86.0)<br>[19 (95)]                 | 86.0 (80.3 – 93.5)<br>[20 (100)]                | 0.39     |
| Prediabetes risk glucose levels (100–125 mg/dL), median (IQR), [n (%)]  | 103.5 (103.0; 104.0) <sup>2</sup><br>[2 (11)]   | 101.0<br>[1 (5)]                                | [0 (0)]                                         | 0.22     |
| Type 2 diabetes risk glucose levels (>125 mg/dL), median (IQR), [n (%)] | 128.0<br>[1 (5)]                                | [0 (0)]                                         | [0 (0)]                                         | -        |
| <b>Triglycerides</b>                                                    |                                                 |                                                 |                                                 |          |
| Acceptable TAGs values (<75 mg/dL) (under 9 y), median (IQR), [n (%)]   | 63.0 (46.0 – 67.0)<br>[5 (50)]                  | 52.0 (38.0 – 66.0)<br>[8 (80)]                  | 60.0 (53.0 – 70.0)<br>[7 (70)]                  | 0.64     |
| Borderline TAGs values (75–99 mg/dL) (under 9 y), median (IQR), [n (%)] | 79.0 (78.0; 80.0) <sup>2</sup><br>[2 (20)]      | 84.5 (79.0; 90.0) <sup>2</sup><br>[2 (20)]      | 90.0<br>[1 (10)]                                | 0.40     |
| High TAGs values (>100 mg/dL) (under 9 y), median (IQR), [n (%)]        | 121.0 (100.0; 130.0) <sup>2</sup><br>[3 (30)]   | [0 (0)]                                         | 102.0 (102.0; 102.0) <sup>2</sup><br>[2 (20)]   | 0.55     |
| Acceptable TAGs values (<90 mg/dl) (10-19 y), median (IQR), [n (%)]     | 58.0 (47.8 – 67.0)<br>[8 (89)]                  | 50.0 (45.0 – 69.0)<br>[7 (70)]                  | 71.5 (51.8 – 86.5)<br>[8 (80)]                  | 0.25     |
| Borderline TAGs values (90–129 mg/dL) (10-19 y), median (IQR), [n (%)]  | 92.0<br>[1 (11)]                                | 109.0<br>[1 (10)]                               | 118.5 (108.0; 129.0) <sup>2</sup><br>[2 (20)]   | 0.41     |
| High TAGs values (>130 mg/dL) (10-19 y), median (IQR), [n (%)]          | [0 (0)]                                         | 146.0 (142.0; 150.0) <sup>2</sup><br>[2 (20)]   | [0 (0)]                                         | -        |
| <b>Total Cholesterol</b>                                                |                                                 |                                                 |                                                 |          |
| Acceptable TC values (<170 mg/dL), median (IQR), [n (%)]                | 121.0 (120.0 – 133.0) <sup>b</sup><br>[15 (79)] | 123.5 (115.8 – 145.0) <sup>b</sup><br>[18 (90)] | 148.0 (130.5 – 164.5) <sup>a</sup><br>[13 (65)] | 0.014    |
| Borderline TC values (170–199 mg/dL), median (IQR), [n (%)]             | 190.0 (182.0; 199.0) <sup>2</sup><br>[3 (16)]   | 171.0 (170.0; 172.0) <sup>2</sup><br>[2 (10)]   | 172.5 (171.0 – 183.0)<br>[4 (20)]               | 0.09     |
| High TC values (≥200 mg/dL), median (IQR), [n (%)]                      | 209.0<br>[1 (5)]                                | [0 (0)]                                         | 222.0 (207.0; 248.0) <sup>2</sup><br>[3 (15)]   | 0.66     |

|                                                                |                                              |                                                |                                               |       |
|----------------------------------------------------------------|----------------------------------------------|------------------------------------------------|-----------------------------------------------|-------|
| HDL-C                                                          |                                              |                                                |                                               |       |
| Acceptable HDL-C values (>45 mg/dL), median (IQR), [n (%)]     | 55.0 (51.0 – 60.0) <sup>a</sup><br>[15 (79)] | 50.0 (48.0 – 53.0) <sup>b</sup><br>[15 (75)]   | 59.0 (51.5 – 68.5) <sup>a</sup><br>[18 (90)]  | 0.026 |
| Borderline HDL-C values (40–45 mg/dL), median (IQR), [n (%)]   | [0 (0)]                                      | 43.5 (43.0; 44.0) <sup>2</sup><br>[2 (10)]     | 43.0<br>[1 (5)]                               | 0.48  |
| Low HDL-C values (<40 mg/dl), median (IQR), [n (%)]            | 36.5 (33.8 – 39.3)<br>[4 (21)]               | 34.0 (33.0; 40.0) <sup>2</sup><br>[3 (15)]     | 39.0<br>[1 (5)]                               | 0.77  |
| LDL-C                                                          |                                              |                                                |                                               |       |
| Acceptable LDL-C values (<110 mg/dL), median (IQR), [n (%)]    | 63.0 (57.0 – 70.0) <sup>b</sup><br>[15 (79)] | 69.5 (56.5 – 86.8) <sup>ab</sup><br>[20 (100)] | 82.0 (70.0 – 95.0) <sup>a</sup><br>[15 (75)]  | 0.015 |
| Borderline LDL-C values (110–129 mg/dL), median (IQR), [n (%)] | 114.0 (112.3 – 122.5)<br>[4 (21)]            | [0 (0)]                                        | 121.0 (120.0; 127.0) <sup>2</sup><br>[3 (15)] | 0.16  |
| High LDL-C values (≥130 mg/dL), median (IQR), [n (%)]          | [0 (0)]                                      | [0 (0)]                                        | 158.5 (152.0; 165.0) <sup>2</sup><br>[2 (10)] | -     |

<sup>1</sup> All values are median (IQR), [n (%)]. Medians in a row with superscripts without a common letter differ,  $p < 0.05$ . Data analysed by Kruskal–Wallis and Mann–Whitney post hoc test. HDL-C, high-density lipoprotein cholesterol; LDL-C, low-density lipoprotein cholesterol; TAGs, triglycerides; TC, total cholesterol.

<sup>2</sup> Values are median (maximum; minimum).

Values for plasma lipid levels are from the NCEP Expert Panel on Cholesterol levels in Children [1, 2]. Values for plasma glucose and TAG levels are from the Screening for Prediabetes and Type 2 Diabetes in Children and Adolescents, US Preventive Services Task Force Recommendation Statement [3].

[1] De Jesus, J.M. Expert Panel on Integrated Guidelines for Cardiovascular Health and Risk Reduction in Children and Adolescents: Summary Report. *Pediatrics* **2011**, *128*, 213–256, doi:10.1542/peds.2009-2107C.

[2] Schefelker, J.M.; Peterson, A.L. Screening and Management of Dyslipidemia in Children and Adolescents. *J. Clin. Med.* **2022**, *11*, doi:10.3390/jcm11216479.

[3] Mangione, C.M.; Barry, M.J.; Nicholson, W.K.; Cabana, M.; Chelmow, D.; Coker, T.R.; Davidson, K.W.; Davis, E.M.; Donahue, K.E.; Jaén, C.R.; et al. Screening for Prediabetes and Type 2 Diabetes in Children and Adolescents: US Preventive Services Task Force Recommendation Statement. *Jama* **2022**, *328*, 963–967, doi:10.1001/jama.2022.14543
